# Supplementary material
Source: PubMed Central journal article supplement (PMC6503468)
Supplement: ac8b05884_si_001.pdf [file ac8b05884_si_001.pdf]

## Supporting Information for:

### UHPLC-ESI-MS/MS quantification of tryptophan metabolites and markers of gut health in serum and plasma – Application to clinical and epidemiology cohorts

Luke Whiley \* <sup>1,2</sup> §, Leanne C Nye\* <sup>3</sup>, Isobelle Grant <sup>3,4</sup>, Nick Andreas <sup>3</sup>, Katie E Chappell <sup>2</sup>, Magali H Sarafian <sup>3</sup>, Ravi Misra <sup>5</sup>, Robert S Plumb <sup>4</sup>, Matthew R Lewis <sup>2</sup>, Jeremy K Nicholson <sup>6</sup> §, Elaine Holmes <sup>1,2,3,6</sup>, Jonathan R Swann <sup>3</sup>, Ian D Wilson <sup>3</sup> §

\* Authors contributed equally

§ Corresponding author

<sup>1</sup> UK Dementia Research Institute, Burlington Danes Building, Imperial College London, Hammersmith Hospital, London, W12 0NN, United Kingdom

<sup>2</sup> MRC-NIHR National Phenome Centre, IRDB Building, Imperial College London, Hammersmith Hospital, London W12 0NN, United Kingdom

<sup>3</sup> Division of Integrative Systems and Digestive Medicine, Department of Surgery and Cancer, Imperial College London, Sir Alexander Fleming Building, South Kensington Campus, London SW7 2AZ, United Kingdom

<sup>4</sup> Waters Corporation, Milford, MA, 01757, USA.

<sup>5</sup> St Marks Hospital and Academic Institute, Watford Rd, Middlesex, London, HA1 3UJ

<sup>6</sup> Australian National Phenome Centre, Murdoch University, Harry Perkins Building, Perth, WA

This supporting information document contains three figures: **Figure S1** shows tryptophan metabolism via the serotonin and kynurenine pathways; **Figure S2** depicts the 96 well plate map layout that was used in the assay; **Figure S3** illustrates the observed effect of detuning the tryptophan multiple reaction monitoring (MRM) transition in negative ionization MS detection mode.

This document also contains 12 tables: **Table S1** provides an overview describing the preparation of an upper limit of quantification stock; **Table S2** details the dilution preparation of working calibration and QC dilutions; **Table S3** provides final concentrations of each level of the calibration series and QC series used in the assay; **Table S4** details the preparation of the internal standard working solution used in the assay; **Table S5** details individual metabolite inter run calibration linearity; **Table S6** details the intra-day and inter-day accuracy and precision of each metabolite; **Table S7** presents results obtained from stability testing of the individual analytes; **Table S8** presents percentage recovery data for each metabolite from plasma; **Table S9** presents the percentage recovery data for each metabolite from serum; **Table S10** provides matrix effect data for each metabolite during analysis; **Table S11** presents mean concentrations, standard deviation and % coefficient of variation values derived from the quantification of analytes from repeat injections of a pool of serum; **Table S12** presents the mean concentration values obtained for repeat biological replicates.

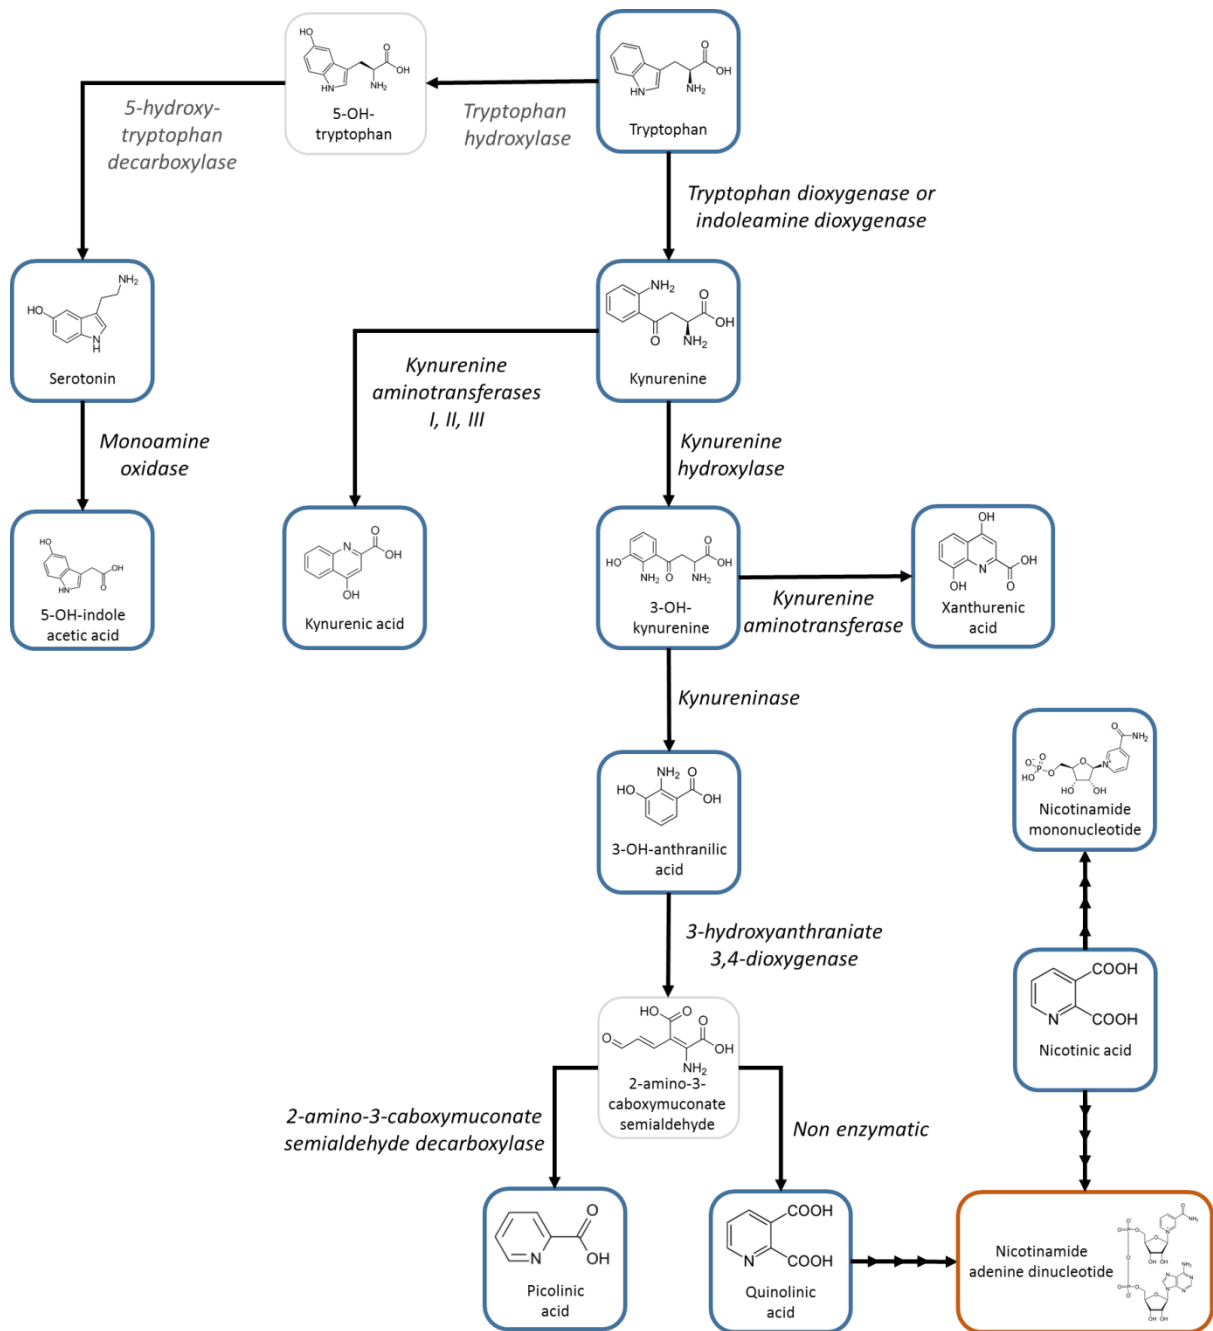

**Supporting Figure S1:**

Tryptophan metabolism via the serotonin and kynurenine pathways. Figure adapted from <sup>64</sup>. Metabolites highlighted in blue were validated for quantitative analysis. Metabolites circled in grey were intermediate metabolites and did not undergo analysis. The mass spectrometry transition for nicotinamide adenine dinucleotide (NAD<sup>+</sup>, highlighted in red) was included for monitoring only and was not quantitative.

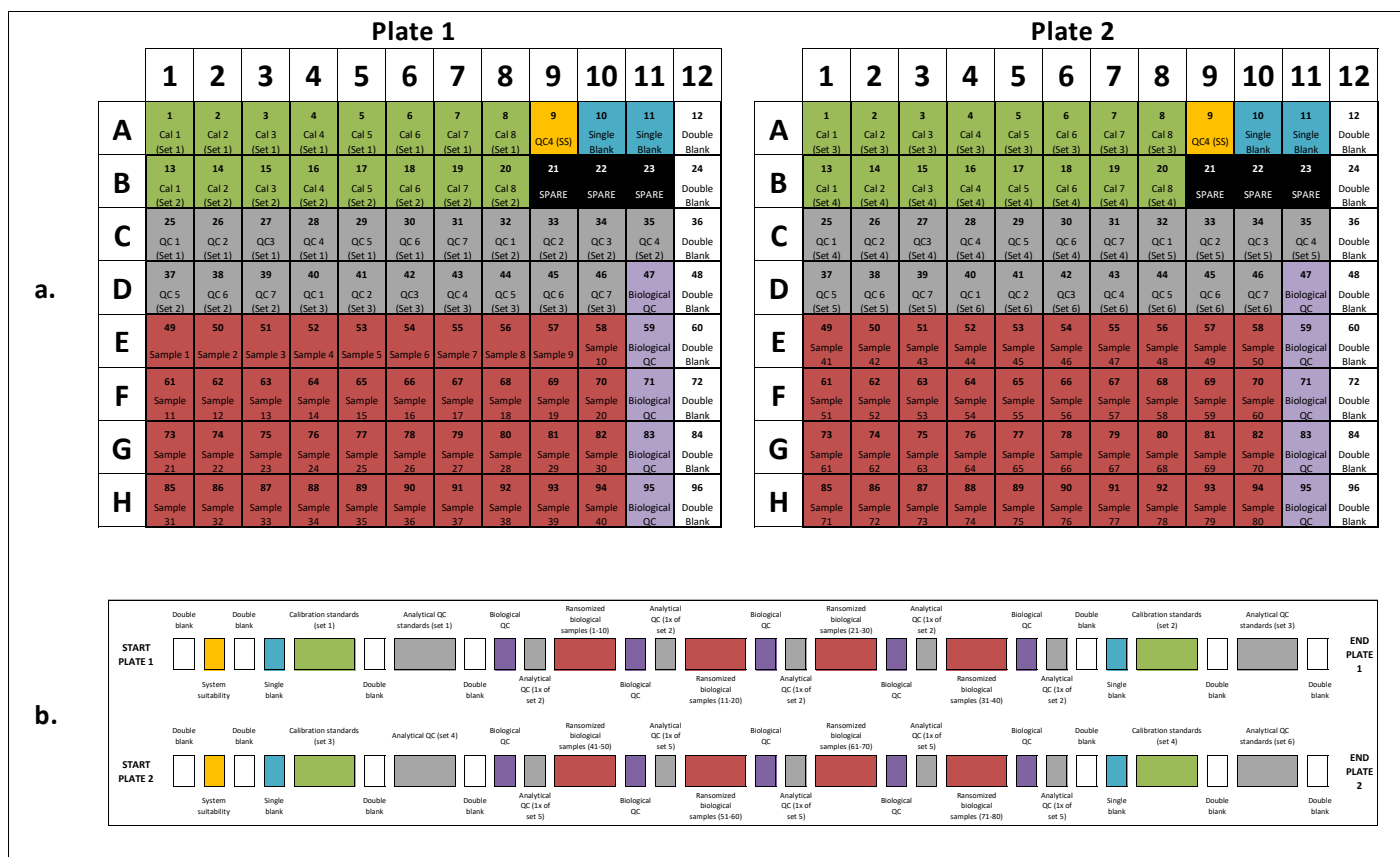

**Supporting Figure S2.**

- 96 well plate map layout used in the assay. The plate map enables two brackets of calibration standards and quality control standards per plate. Using a double plate layout allows for the analysis of 80 biological samples in 24 hours. The inclusion of biological QCs (pool of mixed study sample) allows for the comparison of stability of measurements for each metabolite in a biological matrix across plates in a batch. An extra QC was prepared and run prior to sample analysis and to act as a system suitability (SS) injection to ensure that the chromatography and mass spectrometry detection was performing correctly.
- Sequence of analysis for metabolite quantification of randomized samples that are bracketed by calibration standards and interspersed with both Analytical QC and Biological QC injections.

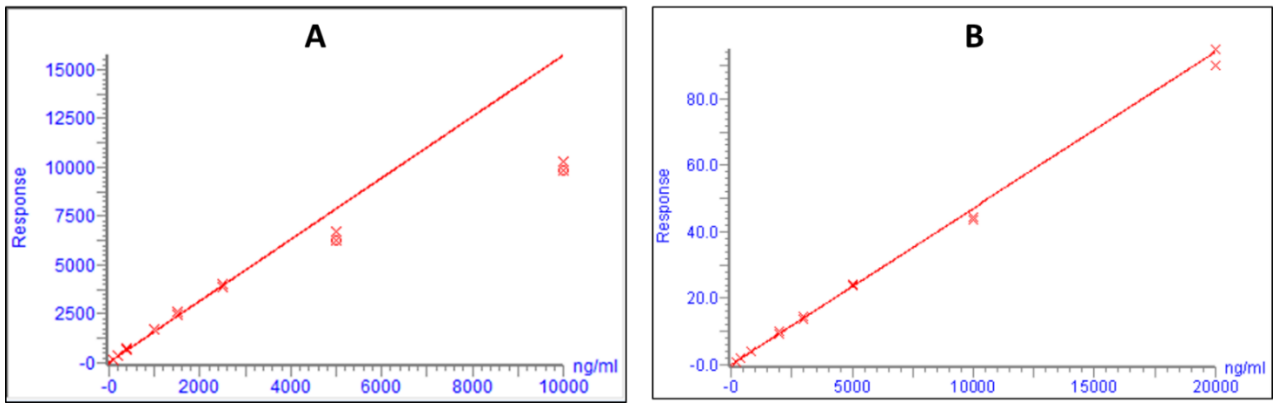

**Supporting Figure S3.** Effect of detuning the tryptophan transition in negative ionization MS detection mode.

- A. A calibration curve for tryptophan in positive ESI, tuned for sensitivity in the range 100-10,000 ng/mL. Non-linearity occurred at > 2500 ng/mL. This was hypothesized to be an effect of in-source saturation.
- B. By polarity switching and detuning the MS capillary voltage (0.25 kV), linearity was achieved across a concentration range suitable for serum and plasma (200 -20,000 ng/mL).

**Supporting Table S1.** Overview describing the preparation of an upper limit of quantification stock C prepared in duplicate for calibration standards and quality control (QC) standards.

| <b>Calibration and QC mixed stock A (prepared in duplicate)</b>          |                      |                    |
|--------------------------------------------------------------------------|----------------------|--------------------|
| <b>Metabolites</b>                                                       | <b>Source stock</b>  | <b>Volume (µL)</b> |
| <b>Neopterin</b>                                                         | Parent 1 mg/mL stock | 2.5                |
| <b>Kynurenic acid, xanthurenic acid, picolinic acid, nicotinic acid</b>  | Parent 1 mg/mL stock | 5                  |
| <b>Dopamine</b>                                                          | Parent 1 mg/mL stock | 10                 |
| <b>Nicotinamide riboside</b>                                             | Parent 1 mg/mL stock | 12.5               |
| <b>5-HIAA, NAD<sup>+</sup>, serotonin, quinolinic acid, 3-HK, 3-HAA</b>  | Parent 1 mg/mL stock | 25                 |
| <b>Kynurenine, βNM,</b>                                                  | Parent 1 mg/mL stock | 50                 |
| <b>NA</b>                                                                | Diluent-D2           | 705                |
| <b>Total volume</b>                                                      | 1000 µL              |                    |
| <b>Calibration and QC mixed stock B (prepared in duplicate)</b>          |                      |                    |
| <b>Metabolites</b>                                                       | <b>Source stock</b>  | <b>Volume (µL)</b> |
| <b>I-3-AA</b>                                                            | Parent 1 mg/mL stock | 50                 |
| <b>Citrulline</b>                                                        | Parent 1 mg/mL stock | 250                |
| <b>Tryptophan</b>                                                        | Parent 1 mg/mL stock | 500                |
| <b>Stock A</b>                                                           | Stock A              | 200                |
| <b>Total volume</b>                                                      | 1000 µL              |                    |
| <b>Calibration and QC mixed stock C – ULOQ - (prepared in duplicate)</b> |                      |                    |
| <b>Metabolites</b>                                                       | <b>Source stock</b>  | <b>Volume (µL)</b> |
| <b>Stock B</b>                                                           | Stock B              | 1000               |
| <b>NA</b>                                                                | Diluent-D2           | 24000              |
| <b>Total volume</b>                                                      | 25000 µL             |                    |

**Supporting Table S2.** Preparation of working calibration and QC dilutions. The total volumes will require alteration depending on analytical batch size. These volumes are suitable for 2x 96 well plate preparation, consisting of 40 unknown samples per plate (see plate layout presented in **Figure S2**).

| <b>Calibration working solution preparation</b> | <b>Solution to dilute</b>         | <b>Volume of solution (μL)</b> | <b>Volume of Diluent D2 (μL)</b> |
|-------------------------------------------------|-----------------------------------|--------------------------------|----------------------------------|
| <b>Calibration level 8 (ULOQ)</b>               | Stock C (Calibration)             | NA                             | NA                               |
| <b>Calibration level 7</b>                      | Calibration 8 (ULOQ)              | 400                            | 400                              |
| <b>Calibration level 6</b>                      | Calibration 7                     | 400                            | 400                              |
| <b>Calibration level 5</b>                      | Calibration 6                     | 480                            | 320                              |
| <b>Calibration level 4</b>                      | Calibration 5                     | 384                            | 192                              |
| <b>Calibration level 3</b>                      | Calibration 4                     | 224                            | 336                              |
| <b>Calibration level 2</b>                      | Calibration 3                     | 240                            | 240                              |
| <b>Calibration level 1</b>                      | Calibration 2                     | 160                            | 160                              |
|                                                 |                                   |                                |                                  |
| <b>QC working solution preparation</b>          | <b>Solution to dilute (ng/mL)</b> | <b>Volume of solution (μL)</b> | <b>Volume of Diluent D2 (μL)</b> |
| <b>QC level 7 (ULOQ)</b>                        | Stock C (QC)                      | NA                             | NA                               |
| <b>QC level 6</b>                               | QC (ULOQ)                         | 800                            | 200                              |
| <b>QC level 5</b>                               | QC 6                              | 400                            | 400                              |
| <b>QC level 4</b>                               | QC 5                              | 200                            | 600                              |
| <b>QC level 3</b>                               | QC4                               | 200                            | 300                              |
| <b>QC level 2</b>                               | QC3                               | 200                            | 200                              |
| <b>QC level 1 (LLOQ)</b>                        | QC2                               | 200                            | 200                              |

**Supporting Table S3.** Final concentrations of each level of the calibration series and QC series used in the assay

| <b>Calibration series preparation - metabolite concentration (ng/mL)</b> |           |                                                                           |          |                          |                                                                |                        |                 |            |            |
|--------------------------------------------------------------------------|-----------|---------------------------------------------------------------------------|----------|--------------------------|----------------------------------------------------------------|------------------------|-----------------|------------|------------|
|                                                                          | Neopterin | Xanthurenic acid,<br>kynurenic acid,<br>picolinic acid,<br>nicotinic acid | Dopamine | Nicotinamide<br>riboside | 5-HIAA, NAD+,<br>serotonin, quinolinic<br>acid, 3-HK,<br>3-HAA | Kynurenine, $\beta$ NM | Indole-3-<br>AA | Citrulline | Tryptophan |
| Calibration level 8<br>(ULOQ)                                            | 20        | 40                                                                        | 80       | 100                      | 200                                                            | 400                    | 2000            | 10000      | 20000      |
| Calibration level 7                                                      | 10        | 20                                                                        | 40       | 50                       | 100                                                            | 200                    | 1000            | 5000       | 10000      |
| Calibration level 6                                                      | 5         | 10                                                                        | 20       | 25                       | 50                                                             | 100                    | 500             | 2500       | 5000       |
| Calibration level 5                                                      | 3         | 6                                                                         | 12       | 15                       | 30                                                             | 60                     | 300             | 1500       | 3000       |
| Calibration level 4                                                      | 2         | 4                                                                         | 8        | 10                       | 20                                                             | 40                     | 200             | 1000       | 2000       |
| Calibration level 3                                                      | 0.8       | 1.6                                                                       | 3.2      | 4                        | 8                                                              | 16                     | 80              | 400        | 800        |
| Calibration level 2                                                      | 0.4       | 0.8                                                                       | 1.6      | 2                        | 4                                                              | 8                      | 40              | 200        | 400        |
| Calibration level 1                                                      | 0.2       | 0.4                                                                       | 0.8      | 1                        | 2                                                              | 4                      | 20              | 100        | 200        |
| <b>QC series preparation - metabolite concentration (ng/mL)</b>          |           |                                                                           |          |                          |                                                                |                        |                 |            |            |
|                                                                          | Neopterin | Xanthurenic acid,<br>kynurenic acid,<br>picolinic acid,<br>nicotinic acid | Dopamine | Nicotinamide<br>riboside | 5-HIAA, NAD+,<br>serotonin, quinolinic<br>acid, 3-HK,<br>3-HAA | Kynurenine, $\beta$ NM | Indole-3-<br>AA | Citrulline | Tryptophan |
| QC level 7 (ULOQ)                                                        | 20        | 40                                                                        | 80       | 100                      | 200                                                            | 400                    | 2000            | 10000      | 20000      |
| QC level 6                                                               | 16        | 32                                                                        | 64       | 80                       | 160                                                            | 320                    | 1600            | 8000       | 16000      |
| QC level 5                                                               | 8         | 16                                                                        | 32       | 40                       | 80                                                             | 160                    | 800             | 4000       | 8000       |
| QC level 4                                                               | 2         | 4                                                                         | 8        | 10                       | 20                                                             | 40                     | 200             | 1000       | 2000       |
| QC level 3                                                               | 0.8       | 1.6                                                                       | 3.2      | 4                        | 8                                                              | 16                     | 80              | 400        | 800        |
| QC level 2                                                               | 0.4       | 0.8                                                                       | 1.6      | 2                        | 4                                                              | 8                      | 40              | 200        | 400        |
| QC level 1 (LLOQ)                                                        | 0.2       | 0.4                                                                       | 0.8      | 1                        | 2                                                              | 4                      | 20              | 100        | 200        |

**Supporting Table S4.** Preparation of the internal standard working solution used in the assay

| <b>Internal standard (IS) mixed stock A</b>                                                                                                                                                                                             |                      |                    |
|-----------------------------------------------------------------------------------------------------------------------------------------------------------------------------------------------------------------------------------------|----------------------|--------------------|
| <b>Metabolites</b>                                                                                                                                                                                                                      | <b>Source stock</b>  | <b>Volume (μL)</b> |
| I-3-AA-D <sub>4</sub> , kynurenic acid-D <sub>5</sub>                                                                                                                                                                                   | Parent 1 mg/mL stock | 30                 |
| Neopterin- <sup>13</sup> C <sub>5</sub> , xanthurenic acid-D <sub>4</sub> ,<br>5-HIAA-D <sub>5</sub> , citrulline-D <sub>4</sub> , nicotinamide riboside-D <sub>3</sub>                                                                 | Parent 1 mg/mL stock | 150                |
| NA                                                                                                                                                                                                                                      | Diluent-D2           | 190                |
| <b>Total volume</b>                                                                                                                                                                                                                     | <b>1000 μL</b>       |                    |
| <b>Internal standard (IS) mixed stock B</b>                                                                                                                                                                                             |                      |                    |
| <b>Metabolites</b>                                                                                                                                                                                                                      | <b>Source stock</b>  | <b>Volume (μL)</b> |
| Nicotinic acid-D <sub>4</sub> , quinolinic acid-D <sub>3</sub> ,<br>dopamine-D <sub>4</sub> , 3-HK- <sup>13</sup> C <sub>2</sub> - <sup>15</sup> N, kynurenine-D <sub>4</sub> ,<br>3-HAA-D <sub>3</sub> , picolinic acid-D <sub>3</sub> | Parent 1 mg/mL stock | 75                 |
| Tryptophan-D <sub>5</sub>                                                                                                                                                                                                               | Parent 1 mg/mL stock | 150                |
| IS stock A                                                                                                                                                                                                                              | IS stock A           | 100                |
| NA                                                                                                                                                                                                                                      | Diluent-D2           | 225                |
| <b>Total volume</b>                                                                                                                                                                                                                     | <b>1000 μL</b>       |                    |
| <b>Internal standard (IS) working solution</b>                                                                                                                                                                                          |                      |                    |
| IS stock B                                                                                                                                                                                                                              | IS stock B           | 500                |
| NA                                                                                                                                                                                                                                      | Diluent-D2           | 24500              |
| <b>Total volume</b>                                                                                                                                                                                                                     | <b>25000 μL</b>      |                    |



**Supporting Table S5.** All metabolites that utilized an internal standard or a surrogate internal standard returned an  $r^2$  value of  $> 0.990$ . MRM transitions for NAD<sup>+</sup> were included for monitoring only, and therefore was not assessed for validation.

|                                  | Calibration range<br>(ng/mL)              | Linearity ( $r^2$ )       |                           |                           |
|----------------------------------|-------------------------------------------|---------------------------|---------------------------|---------------------------|
|                                  |                                           | Calibration -<br>repeat 1 | Calibration -<br>repeat 2 | Calibration -<br>repeat 3 |
| <b>3-HAA</b>                     | 2-200                                     | 0.991                     | 0.994                     | 0.992                     |
| <b>3-HK</b>                      | 2-200                                     | 0.997                     | 0.997                     | 0.999                     |
| <b>5-HIAA</b>                    | 2-200                                     | 0.994                     | 0.997                     | 0.995                     |
| <b>βNM</b>                       | 4-400                                     | 0.998                     | 0.998                     | 0.998                     |
| <b>Citrulline</b>                | 100-10,000                                | 0.999                     | 0.999                     | 0.998                     |
| <b>Dopamine</b>                  | 0.8-80                                    | 0.991                     | 0.997                     | 0.998                     |
| <b>I-3-AA</b>                    | 20-2000                                   | 0.999                     | 0.998                     | 0.996                     |
| <b>Kynurenic acid</b>            | 0.4-40                                    | 0.999                     | 0.998                     | 0.997                     |
| <b>Kynurenine</b>                | 8-400                                     | 0.992                     | 0.992                     | 0.997                     |
| <b>NAD<sup>+</sup></b>           | <i>NA (monitored MRM transition only)</i> |                           |                           |                           |
| <b>Neopterin</b>                 | 0.2-200                                   | 0.996                     | 0.999                     | 0.993                     |
| <b>Nicotinic acid</b>            | 0.4-40                                    | 0.990                     | 0.993                     | 0.993                     |
| <b>Nicotinamide<br/>riboside</b> | 1-100                                     | 0.997                     | 0.997                     | 0.997                     |
| <b>Picolinic Acid</b>            | 0.4-40                                    | 0.996                     | 0.996                     | 0.994                     |
| <b>Quinolinic acid</b>           | 1-100                                     | 0.994                     | 0.995                     | 0.995                     |
| <b>Serotonin</b>                 | 2-200                                     | 0.995                     | 0.996                     | 0.995                     |
| <b>Tryptophan</b>                | 200-20,000                                | 0.994                     | 0.997                     | 0.993                     |
| <b>Xanthurenic acid</b>          | 0.4-40                                    | 0.993                     | 0.997                     | 0.996                     |

**Supporting Table S6.** Intra-day and inter-day accuracy and precision

| Compound                             | Run         | QC concentration in ng/mL<br>(Coefficients of Variation (%)) |             |             |              |              |               |               |
|--------------------------------------|-------------|--------------------------------------------------------------|-------------|-------------|--------------|--------------|---------------|---------------|
|                                      |             | QC 1 (LLOQ)                                                  | QC 2        | QC 3        | QC 4         | QC 5         | QC 6          | QC 7 (ULOQ)   |
| <b>Target concentrations (ng/mL)</b> |             | <b>200</b>                                                   | <b>400</b>  | <b>800</b>  | <b>2000</b>  | <b>8000</b>  | <b>16,000</b> | <b>20,000</b> |
| Tryptophan                           | Intra-run 1 | 198.9 (5.4)                                                  | 409.2 (6.7) | 804.7 (7.1) | 2078.4 (8.6) | 7839.0 (4.3) | 15895.2 (5.6) | 19750.9 (4.2) |
|                                      | Intra-run 2 | 194.4 (6.2)                                                  | 412.4 (3.9) | 843.0 (4.1) | 2136.9 (5.9) | 8158.5 (5.7) | 15759.8 (4.0) | 20065.9 (3.9) |
|                                      | Intra-run 3 | 204.3 (9.3)                                                  | 420.0 (4.6) | 829.4 (6.3) | 2022.2 (5.0) | 7882.3 (4.0) | 15173.1 (7.2) | 18472.7 (4.4) |
|                                      | Inter-run   | 199.2 (7.1)                                                  | 413.9 (5.0) | 825.7 (5.9) | 2079.2 (6.7) | 7960.0 (4.8) | 15609.4 (5.7) | 19429.8 (5.3) |
| <b>Target concentrations (ng/mL)</b> |             | <b>100</b>                                                   | <b>200</b>  | <b>400</b>  | <b>1000</b>  | <b>4000</b>  | <b>8000</b>   | <b>10,000</b> |
| Citrulline                           | Intra-run 1 | 99.5 (3.7)                                                   | 201.1 (3.4) | 400.0 (2.8) | 1012.9 (2.1) | 3983.4 (2.3) | 8062.5 (2.2)  | 10144.5 (1.3) |
|                                      | Intra-run 2 | 95.8 (4.6)                                                   | 198.3 (2.8) | 414.2 (2.5) | 1015.6 (4.3) | 4034.2 (2.1) | 8022.9 (1.0)  | 9783.2 (4.0)  |
|                                      | Intra-run 3 | 101.9 (6.6)                                                  | 203.2 (3.3) | 407.6 (3.9) | 1005.2 (4.0) | 4018.4 (1.9) | 7988.5 (4.3)  | 9638.4 (2.8)  |
|                                      | Inter-run   | 99.2 (5.5)                                                   | 200.9 (3.2) | 407.3 (3.3) | 1011.2 (3.4) | 4012.0 (2.1) | 8024.6 (2.7)  | 9855.4 (3.5)  |
| <b>Target concentrations (ng/mL)</b> |             | <b>20</b>                                                    | <b>40</b>   | <b>80</b>   | <b>200</b>   | <b>800</b>   | <b>1600</b>   | <b>2000</b>   |
| l-3-AA                               | Intra-run 1 | 20.5 (3.5)                                                   | 42.1 (1.0)  | 83.3 (3.3)  | 207.2 (2.2)  | 795.2 (1.0)  | 1547.9 (3.6)  | 1900.2 (2.4)  |
|                                      | Intra-run 2 | 21.2 (4.0)                                                   | 42.8 (3.9)  | 83.8 (1.4)  | 209.1 (2.4)  | 824.1 (3.1)  | 1555.9 (2.9)  | 1877.8 (2.8)  |
|                                      | Intra-run 3 | 20.3 (2.3)                                                   | 41.6 (3.3)  | 85.3 (2.7)  | 208.6 (4.7)  | 804.7 (2.4)  | 1544.3 (4.1)  | 1832.8 (3.3)  |
|                                      | Inter-run   | 20.7 (3.6)                                                   | 42.2 (3.1)  | 84.1 (2.6)  | 208.3 (3.1)  | 808.0 (2.7)  | 1549.4 (3.4)  | 1870.2 (3.1)  |
| <b>Target concentrations (ng/mL)</b> |             | <b>4</b>                                                     | <b>8</b>    | <b>16</b>   | <b>40</b>    | <b>160</b>   | <b>320</b>    | <b>400</b>    |
| Kynurenine                           | Intra-run 1 | -                                                            | 7.0 (6.7)   | 14.6 (3.8)  | 39.9 (4.3)   | 140.0 (2.5)  | 280.4 (2.1)   | 349.5 (1.8)   |
|                                      | Intra-run 2 | -                                                            | 7.0 (5.0)   | 16.8 (3.7)  | 40.9 (6.5)   | 144.9 (3.6)  | 278.3 (2.0)   | 345.8 (1.8)   |
|                                      | Intra-run 3 | -                                                            | 7.6 (4.9)   | 16.1 (5.9)  | 42.5 (3.1)   | 159.9 (3.6)  | 299.4 (5.3)   | 373.7 (4.6)   |
|                                      | Inter-run   | -                                                            | 7.2 (6.6)   | 15.8 (7.3)  | 41.1 (5.3)   | 148.2 (6.6)  | 286.0 (4.8)   | 356.3 (4.6)   |
| βNM                                  | Intra-run 1 | 4.1 (2.1)                                                    | 8.1 (2.4)   | 15.9 (3.7)  | 39.2 (2.4)   | 154.8 (2.1)  | 311.2 (3.6)   | 397.3 (2.8)   |
|                                      | Intra-run 2 | 3.8 (7.4)                                                    | 8.1 (4.7)   | 16.2 (8.7)  | 40.3 (5.5)   | 161.4 (3.1)  | 337.4 (3.6)   | 421.3 (4.7)   |
|                                      | Intra-run 3 | 4.2 (4.7)                                                    | 8.0 (3.1)   | 16.5 (2.8)  | 40.0 (4.1)   | 160.7 (3.4)  | 324.1 (5.3)   | 403.9 (2.6)   |
|                                      | Inter-run   | 4.0 (6.2)                                                    | 8.1 (3.3)   | 16.2 (5.3)  | 39.8 (4.2)   | 158.8 (3.4)  | 323.5 (5.2)   | 406.7 (4.1)   |
| <b>Target concentrations (ng/mL)</b> |             | <b>2</b>                                                     | <b>4</b>    | <b>8</b>    | <b>20</b>    | <b>80</b>    | <b>160</b>    | <b>200</b>    |
| 3-HAA                                | Intra-run 1 | 2.1 (13.2)                                                   | 4.1 (8.8)   | 8.5 (7.6)   | 21.4 (2.7)   | 89.7 (3.2)   | 178.0 (2.4)   | 221.5 (1.8)   |
|                                      | Intra-run 2 | 2.1 (12.2)                                                   | 4.0 (6.4)   | 8.3 (6.3)   | 22.0 (2.4)   | 86.4 (4.4)   | 176.2 (2.1)   | 220.2 (2.8)   |
|                                      | Intra-run 3 | 2.2 (6.4)                                                    | 4.2 (8.2)   | 8.6 (5.7)   | 21.3 (3.8)   | 88.9 (2.5)   | 175.6 (2.7)   | 212.6 (2.9)   |
|                                      | Inter-run   | 2.1 (10.4)                                                   | 4.1 (7.7)   | 8.4 (6.3)   | 21.5 (3.2)   | 88.3 (3.7)   | 176.6 (2.4)   | 218.4 (3.0)   |
| Serotonin                            | Intra-run 1 | 2.2 (12.6)                                                   | 4.1 (4.8)   | 8.1 (6.0)   | 20.2 (5.9)   | 80.6 (4.4)   | 168.3 (4.6)   | 211.8 (4.8)   |
|                                      | Intra-run 2 | 2.3 (3.6)                                                    | 4.2 (3.0)   | 8.1 (3.0)   | 20.4 (6.7)   | 82.8 (2.4)   | 172.5 (3.9)   | 213.7 (3.8)   |
|                                      | Intra-run 3 | 2.0 (5.7)                                                    | 3.9 (6.0)   | 8.1 (6.4)   | 20.5 (5.9)   | 82.1 (7.9)   | 165.3 (6.0)   | 190.7 (4.0)   |
|                                      | Inter-run   | 2.2 (12.6)                                                   | 4.1 (4.8)   | 8.1 (6.0)   | 20.2 (5.9)   | 80.6 (4.4)   | 168.3 (4.6)   | 211.8 (4.8)   |

|                                        |             | QC concentration in ng/mL<br>(Coefficients of Variation (%)) |            |            |            |            |             |             |
|----------------------------------------|-------------|--------------------------------------------------------------|------------|------------|------------|------------|-------------|-------------|
| Compound                               | Run         | QC 1 (LLOQ)                                                  | QC 2       | QC 3       | QC 4       | QC 5       | QC 6        | QC 7 (ULOQ) |
| Quinolinic acid                        | Intra-run 1 | 2.1 (9.1)                                                    | 4.2 (5.3)  | 8.2 (4.6)  | 19.9 (6.4) | 79.7 (2.9) | 154.9 (5.7) | 194.6 (2.8) |
|                                        | Intra-run 2 | 2.1 (8.4)                                                    | 4.2 (5.8)  | 8.5 (2.9)  | 20.3 (3.5) | 80.6 (2.9) | 158.3 (3.5) | 201.9 (3.4) |
|                                        | Intra-run 3 | 1.9 (12.9)                                                   | 4.1 (8.0)  | 8.3 (4.6)  | 20.3 (3.0) | 80.6 (6.3) | 158.4 (4.3) | 197.5 (3.6) |
|                                        | Inter-run   | 2.0 (10.9)                                                   | 4.1 (6.2)  | 8.3 (4.2)  | 20.2 (4.4) | 80.3 (4.1) | 157.2 (4.4) | 198.0 (3.5) |
| 5-HIAA                                 | Intra-run 1 | 1.9 (1.8)                                                    | 4.1 (2.8)  | 8.5 (1.4)  | 20.8 (5.0) | 85.3 (4.8) | 170.9 (4.9) | 207.6 (4.0) |
|                                        | Intra-run 2 | 2.2 (5.9)                                                    | 4.3 (5.2)  | 8.5 (3.7)  | 21.5 (6.1) | 81.6 (8.4) | 172.1 (2.7) | 198.2 (2.7) |
|                                        | Intra-run 3 | 2.0 (1.2)                                                    | 4.2 (5.4)  | 8.5 (4.1)  | 20.2 (4.6) | 85.1 (4.5) | 163.3 (4.3) | 202.5 (3.6) |
|                                        | Inter-run   | 2.1 (6.8)                                                    | 4.2 (4.8)  | 8.5 (3.1)  | 20.8 (5.6) | 84.0 (6.1) | 168.7 (4.5) | 202.8 (3.8) |
| 3-HK                                   | Intra-run 1 | 2.2 (12.8)                                                   | 4.5 (3.1)  | 8.7 (3.3)  | 21.9 (1.6) | 87.1 (2.6) | 176.3 (2.7) | 225.6 (0.8) |
|                                        | Intra-run 2 | 2.0 (6.3)                                                    | 4.0 (5.0)  | 8.5 (2.2)  | 21.8 (2.1) | 89.0 (1.7) | 179.2 (1.1) | 225.0 (1.5) |
|                                        | Intra-run 3 | 2.1 (3.8)                                                    | 4.3 (3.9)  | 8.5 (5.5)  | 21.4 (2.6) | 87.2 (3.0) | 168.9 (3.5) | 216.1 (1.5) |
|                                        | Inter-run   | 2.1 (9.3)                                                    | 4.3 (6.3)  | 8.6 (3.7)  | 21.7 (2.2) | 87.8 (2.6) | 174.8 (3.5) | 222.2 (2.3) |
| NAD+<br>(monitored<br>metabolite only) | Intra-run 1 | <i>NA (monitored MRM transition only)</i>                    |            |            |            |            |             |             |
|                                        | Intra-run 2 |                                                              |            |            |            |            |             |             |
|                                        | Intra-run 3 |                                                              |            |            |            |            |             |             |
|                                        | Inter-run   |                                                              |            |            |            |            |             |             |
| <b>Target concentrations (ng/mL)</b>   |             | <b>1</b>                                                     | <b>2</b>   | <b>4</b>   | <b>10</b>  | <b>40</b>  | <b>80</b>   | <b>100</b>  |
| Nicotinamide<br>riboside               | Intra-run 1 | 1.0 (1.7)                                                    | 2.0 (4.5)  | 4.0 (4.1)  | 10.0 (3.4) | 39.4 (4.0) | 80.8 (4.2)  | 100.8 (3.0) |
|                                        | Intra-run 2 | 1.0 (8.7)                                                    | 2.0 (4.1)  | 4.1 (5.2)  | 10.5 (3.4) | 40.9 (5.1) | 82.6 (3.2)  | 102.6 (4.0) |
|                                        | Intra-run 3 | 1.0 (6.6)                                                    | 2.0 (5.0)  | 4.1 (3.6)  | 9.9 (3.4)  | 40.4 (3.0) | 80.1 (3.7)  | 100.0 (3.1) |
|                                        | Inter-run   | 1.0 (6.1)                                                    | 2.0 (4.4)  | 4.1 (4.4)  | 10.1 (4.0) | 40.3 (4.2) | 81.2 (3.7)  | 101.1 (3.4) |
| <b>Target concentrations (ng/mL)</b>   |             | <b>0.8</b>                                                   | <b>1.6</b> | <b>3.2</b> | <b>8</b>   | <b>32</b>  | <b>64</b>   | <b>80</b>   |
| Dopamine                               | Intra-run 1 | 0.9 (8.8)                                                    | 1.7 (5.5)  | 3.4 (5.6)  | 8.2 (3.3)  | 31.6 (2.2) | 61.9 (3.8)  | 80.8 (5.2)  |
|                                        | Intra-run 2 | 0.9 (4.5)                                                    | 1.8 (3.1)  | 3.4 (5.3)  | 8.2 (2.9)  | 33.7 (4.0) | 64.0 (2.6)  | 82.2 (2.3)  |
|                                        | Intra-run 3 | 0.9 (3.8)                                                    | 1.6 (6.2)  | 3.3 (4.9)  | 8.0 (2.4)  | 32.9 (3.9) | 64.5 (5.2)  | 80.3 (1.8)  |
|                                        | Inter-run   | 0.9 (6.0)                                                    | 1.7 (5.8)  | 3.4 (5.0)  | 8.1 (2.9)  | 32.8 (4.3) | 63.5 (4.2)  | 81.1 (3.4)  |
| <b>Target concentrations (ng/mL)</b>   |             | <b>0.4</b>                                                   | <b>0.8</b> | <b>1.6</b> | <b>4</b>   | <b>16</b>  | <b>32</b>   | <b>40</b>   |
| Picolinic acid                         | Intra-run 1 | 0.4 (6.7)                                                    | 0.8 (6.5)  | 1.6 (11.2) | 4.1 (9.7)  | 16.6 (5.4) | 32.8 (3.0)  | 41.6 (1.3)  |
|                                        | Intra-run 2 | 0.4 (11.4)                                                   | 0.8 (7.5)  | 1.6 (8.9)  | 4.4 (4.6)  | 16.4 (3.2) | 33.0 (3.1)  | 41.4 (4.6)  |
|                                        | Intra-run 3 | 0.4 (15.4)                                                   | 0.9 (6.5)  | 1.7 (4.3)  | 4.1 (8.1)  | 16.2 (4.2) | 33.1 (4.1)  | 39.9 (1.5)  |
|                                        | Inter-run   | 0.4 (11.6)                                                   | 0.8 (7.7)  | 1.6 (9.0)  | 4.2 (7.8)  | 16.4 (4.3) | 33.0 (3.3)  | 41.0 (3.4)  |
| Nicotinic acid                         | Intra-run 1 | 0.4 (9.8)                                                    | 0.8 (10.5) | 1.6 (8.7)  | 4.1 (7.1)  | 15.9 (4.2) | 31.4 (3.8)  | 38.5 (3.1)  |
|                                        | Intra-run 2 | 0.4 (8.0)                                                    | 0.8 (8.3)  | 1.6 (1.9)  | 4.0 (4.7)  | 16.0 (5.1) | 32.4 (4.9)  | 37.6 (4.5)  |
|                                        | Intra-run 3 | 0.4 (8.4)                                                    | 0.8 (7.1)  | 1.6 (9.3)  | 4.1 (3.7)  | 16.4 (5.3) | 32.4 (5.4)  | 38.1 (3.7)  |
|                                        | Inter-run   | 0.4 (8.7)                                                    | 0.8 (9.1)  | 1.6 (7.3)  | 4.1 (5.1)  | 16.1 (4.8) | 32.1 (4.7)  | 38.1 (3.7)  |

|                                      |             | QC concentration in ng/mL<br>(Coefficients of Variation (%)) |            |            |           |            |            |             |
|--------------------------------------|-------------|--------------------------------------------------------------|------------|------------|-----------|------------|------------|-------------|
| Compound                             | Run         | QC 1 (LLOQ)                                                  | QC 2       | QC 3       | QC 4      | QC 5       | QC 6       | QC 7 (ULOQ) |
| Kynurenic acid                       | Intra-run 1 | 0.4 (7.0)                                                    | 0.8 (4.8)  | 1.6 (1.1)  | 4.1 (2.8) | 16.0 (2.7) | 32.1 (2.4) | 40.3 (2.7)  |
|                                      | Intra-run 2 | 0.4 (1.8)                                                    | 0.8 (5.9)  | 1.7 (4.6)  | 4.2 (3.8) | 16.4 (1.1) | 32.9 (3.4) | 40.2 (1.3)  |
|                                      | Intra-run 3 | 0.4 (5.4)                                                    | 0.9 (2.6)  | 1.7 (4.4)  | 4.1 (3.9) | 16.2 (2.4) | 32.5 (4.8) | 39.2 (4.1)  |
|                                      | Inter-run   | 0.4 (6.8)                                                    | 0.8 (4.9)  | 1.7 (3.6)  | 4.1 (3.8) | 16.2 (2.3) | 32.5 (3.6) | 40.0 (3.0)  |
| Xanthurenic acid                     | Intra-run 1 | 0.4 (8.2)                                                    | 0.8 (8.6)  | 1.6 (5.4)  | 4.0 (3.1) | 15.6 (1.8) | 31.6 (5.5) | 40.1 (3.0)  |
|                                      | Intra-run 2 | 0.4 (8.0)                                                    | 0.8 (7.2)  | 1.7 (4.5)  | 4.1 (3.3) | 16.2 (2.8) | 32.9 (4.4) | 40.5 (2.3)  |
|                                      | Intra-run 3 | 0.4 (8.8)                                                    | 0.8 (6.2)  | 1.6 (2.8)  | 3.9 (3.5) | 16.5 (4.1) | 32.5 (3.6) | 40.7 (4.7)  |
|                                      | Inter-run   | 0.4 (9.0)                                                    | 0.8 (7.3)  | 1.6 (4.5)  | 4.0 (4.4) | 16.1 (3.7) | 32.3 (4.6) | 40.4 (3.3)  |
| <b>Target concentrations (ng/mL)</b> |             | <b>0.2</b>                                                   | <b>0.4</b> | <b>0.8</b> | <b>2</b>  | <b>8</b>   | <b>16</b>  | <b>20</b>   |
| Neopterin                            | Intra-run 1 | 0.2 (5.1)                                                    | 0.4 (5.6)  | 0.8 (3.4)  | 2.0 (3.4) | 7.9 (3.4)  | 15.9 (3.8) | 20.3 (3.8)  |
|                                      | Intra-run 2 | 0.2 (12.5)                                                   | 0.4 (4.9)  | 0.9 (4.6)  | 2.1 (4.1) | 8.3 (2.0)  | 16.8 (2.1) | 21.0 (3.3)  |
|                                      | Intra-run 3 | 0.2 (8.5)                                                    | 0.4 (5.9)  | 0.9 (4.4)  | 2.0 (6.7) | 8.4 (3.0)  | 16.7 (3.1) | 20.4 (1.4)  |
|                                      | Inter-run   | 0.2 (9.1)                                                    | 0.4 (5.3)  | 0.8 (4.5)  | 2.0 (4.8) | 8.2 (3.9)  | 16.5 (3.9) | 20.6 (3.2)  |

**Supporting Table S7.** Results from stability testing of the analytes. Standards were prepared in diluent containing citric acid and were assessed for stability at 24 hours in a 4°C autosampler and both at 1 and 2 weeks at -20°C. This was repeated with a low and a high QC (QC 2 and 6). The QC samples that underwent quantification after storage reported acceptable stability of > 97% for the high QC for all metabolites, and greater than 90% in the low QC. The exception was picolinic acid where stability was 90.74% after 1 week, and 83.33% after 2 weeks.

|                          | Low QC                                |                                    |                                     | High QC                               |                                    |                                     |
|--------------------------|---------------------------------------|------------------------------------|-------------------------------------|---------------------------------------|------------------------------------|-------------------------------------|
|                          | % Stability<br>24-hour<br>autosampler | % Stability<br>1 Week at<br>-20 °C | % Stability<br>2 Weeks at<br>-20 °C | % Stability<br>24-hour<br>autosampler | % Stability<br>1 Week at<br>-20 °C | % Stability<br>2 Weeks at<br>-20 °C |
| Picolinic Acid           | 97.8                                  | 90.7                               | 83.3                                | 102.8                                 | 103.3                              | 102.0                               |
| Nicotinic acid           | 95.6                                  | 95.9                               | 100.0                               | 98.2                                  | 105.0                              | 102.9                               |
| 3-HAA                    | 100.0                                 | 98.8                               | 97.3                                | 100.1                                 | 101.6                              | 101.0                               |
| Dopamine                 | 103.1                                 | 100.9                              | 96.2                                | 103.3                                 | 97.5                               | 98.6                                |
| Serotonin                | 102.6                                 | 99.2                               | 95.4                                | 102.6                                 | 101.1                              | 98.1                                |
| Quinolinic acid          | 99.5                                  | 97.0                               | 94.7                                | 99.3                                  | 101.2                              | 100.9                               |
| Citrulline               | 98.1                                  | 96.0                               | 98.7                                | 102.9                                 | 103.6                              | 101.5                               |
| I-3-AA                   | 101.2                                 | 102.6                              | 96.1                                | 104.4                                 | 104.1                              | 101.5                               |
| Kynurenic acid           | 96.3                                  | 106.4                              | 104.3                               | 102.3                                 | 100.9                              | 97.7                                |
| 5-HIAA                   | 99.6                                  | 103.1                              | 98.8                                | 103.2                                 | 111.7                              | 105.4                               |
| Xanthurenic acid         | 106.2                                 | 98.0                               | 95.9                                | 102.5                                 | 99.9                               | 97.7                                |
| Kynurenine               | 91.3                                  | 95.3                               | 101.6                               | 101.6                                 | 99.0                               | 99.7                                |
| 3-HK                     | 101.9                                 | 98.0                               | 97.2                                | 102.9                                 | 105.2                              | 105.3                               |
| Neopterin                | 102.8                                 | 100.0                              | 100.0                               | 102.9                                 | 103.5                              | 99.8                                |
| Nicotinamide<br>riboside | 102.1                                 | 101.6                              | 97.5                                | 104.0                                 | 104.2                              | 100.8                               |
| βNM                      | 94.6                                  | 104.7                              | 101.9                               | 102.5                                 | 110.8                              | 98.1                                |
| NAD+                     | 117.3                                 | 96.2                               | 105.8                               | 106.6                                 | 99.4                               | 105.1                               |
| Tryptophan               | 98.7                                  | 101.4                              | 100.2                               | 104.3                                 | 98.7                               | 98.6                                |

**Supporting Table 8.** Results of recovery study for plasma. Extraction recoveries were calculated by comparing SIL internal standards spiked into matrix after the protein precipitation/SPE extraction protocol, with SIL internal standards that were spiked into matrix prior to extraction. Plasma metabolite recoveries were typically greater than 90%, with only dopamine-D<sub>4</sub> (83 %), quinolinic acid-D<sub>3</sub> (80 %) and nicotinamide riboside-D<sub>3</sub> (53%) being the exceptions.

|                                                      | Recovery %<br>Plasma 1 | Recovery %<br>Plasma 2 | Recovery %<br>Plasma 3 | Recovery %<br>Plasma 4 | Recovery %<br>Plasma 5 | Recovery %<br>Plasma 6 | Recovery %<br>mean recovery |
|------------------------------------------------------|------------------------|------------------------|------------------------|------------------------|------------------------|------------------------|-----------------------------|
| 3-HAA-D <sub>3</sub>                                 | 97.0                   | 103.5                  | 92.8                   | 91.4                   | 97.0                   | 97.9                   | 96.6                        |
| 3-HK- <sup>13</sup> C <sub>2</sub> - <sup>15</sup> N | 97.3                   | 97.7                   | 93.3                   | 96.6                   | 97.7                   | 91.3                   | 95.6                        |
| 5-HIAA-D <sub>5</sub>                                | 102.5                  | 114.2                  | 103.2                  | 113.6                  | 110.5                  | 95.5                   | 106.6                       |
| Citrulline-D <sub>4</sub>                            | 92.7                   | 100.0                  | 88.1                   | 82.7                   | 90.7                   | 102.8                  | 92.8                        |
| Dopamine-D <sub>4</sub>                              | 78.8                   | 91.3                   | 79.2                   | 83.1                   | 84.3                   | 81.1                   | 83.0                        |
| I-3-AA-D <sub>4</sub>                                | 83.5                   | 97.8                   | 95.5                   | 96.6                   | 97.5                   | 102.3                  | 95.5                        |
| Kynurenic acid-D <sub>5</sub>                        | 92.0                   | 92.2                   | 92.0                   | 91.7                   | 94.1                   | 96.0                   | 93.0                        |
| Kynurenine-D <sub>4</sub>                            | 94.0                   | 95.1                   | 93.5                   | 97.3                   | 97.2                   | 92.8                   | 95.0                        |
| Neopterin- <sup>13</sup> C <sub>5</sub>              | 90.9                   | 92.9                   | 92.3                   | 90.6                   | 92.7                   | 93.6                   | 92.2                        |
| Nicotinic acid-D <sub>4</sub>                        | 90.4                   | 92.9                   | 92.0                   | 93.7                   | 93.4                   | 95.4                   | 93.0                        |
| Nicotinamide riboside-D <sub>3</sub>                 | 52.9                   | 53.1                   | 52.5                   | 54.8                   | 53.2                   | 50.3                   | 52.8                        |
| Picolinic acid-D <sub>3</sub>                        | 92.0                   | 94.5                   | 90.5                   | 83.1                   | 93.1                   | 90.6                   | 90.6                        |
| Quinolinic acid-D <sub>3</sub>                       | 80.2                   | 81.2                   | 80.7                   | 74.4                   | 80.0                   | 81.6                   | 79.7                        |
| Tryptophan-D <sub>5</sub>                            | 90.4                   | 86.4                   | 94.0                   | 78.8                   | 105.6                  | 93.9                   | 91.5                        |
| Xanthurenic acid-D <sub>4</sub>                      | 93.0                   | 91.3                   | 91.7                   | 91.0                   | 92.5                   | 96.0                   | 92.6                        |

**Supporting Table S9.** Results of recovery study for serum. Extraction recoveries were calculated by comparing SIL internal standards spiked into matrix after the protein precipitation/SPE extraction protocol, with SIL internal standards that were spiked into matrix prior to extraction. Serum metabolite recoveries were typically greater than 85%, with quinolinic acid-D<sub>3</sub> (79%) and nicotinamide riboside-D<sub>3</sub> (52%) being the exceptions.

|                                                      | Recovery %<br>Serum 1 | Recovery %<br>Serum 2 | Recovery %<br>Serum 3 | Recovery %<br>Serum 4 | Recovery %<br>Serum 5 | Recovery %<br>Serum 6 | Recovery %<br>mean recovery |
|------------------------------------------------------|-----------------------|-----------------------|-----------------------|-----------------------|-----------------------|-----------------------|-----------------------------|
| 3-HAA-D <sub>3</sub>                                 | 107.1                 | 99.9                  | 103.0                 | 98.3                  | 101.2                 | 93.1                  | 100.4                       |
| 3-HK- <sup>13</sup> C <sub>2</sub> - <sup>15</sup> N | 91.8                  | 95.3                  | 94.8                  | 94.6                  | 103.0                 | 91.3                  | 95.1                        |
| 5-HIAA-D <sub>5</sub>                                | 102.7                 | 105.8                 | 110.0                 | 107.5                 | 107.9                 | 110.7                 | 107.4                       |
| Citrulline-D <sub>4</sub>                            | 86.7                  | 95.8                  | 92.1                  | 100.9                 | 93.9                  | 82.6                  | 92.0                        |
| Dopamine-D <sub>4</sub>                              | 89.9                  | 83.5                  | 86.7                  | 87.4                  | 89.6                  | 85.9                  | 87.2                        |
| I-3-AA-D <sub>4</sub>                                | 96.6                  | 90.8                  | 97.8                  | 91.7                  | 100.0                 | 99.8                  | 96.1                        |
| Kynurenic acid-D <sub>5</sub>                        | 93.7                  | 90.9                  | 94.3                  | 92.7                  | 97.4                  | 91.5                  | 93.4                        |
| Kynurenine-D <sub>4</sub>                            | 89.1                  | 94.3                  | 92.4                  | 94.2                  | 103.5                 | 90.7                  | 94.0                        |
| Neopterin- <sup>13</sup> C <sub>5</sub>              | 94.7                  | 90.3                  | 92.3                  | 91.8                  | 94.3                  | 90.1                  | 92.3                        |
| Nicotinic acid-D <sub>4</sub>                        | 90.7                  | 89.6                  | 93.4                  | 94.3                  | 98.2                  | 93.4                  | 93.3                        |
| Nicotinamide riboside-D <sub>3</sub>                 | 48.4                  | 49.9                  | 49.9                  | 55.8                  | 58.8                  | 51.8                  | 52.4                        |
| Picolinic acid-D <sub>3</sub>                        | 81.9                  | 91.2                  | 93.3                  | 92.6                  | 91.7                  | 86.9                  | 89.6                        |
| Quinolinic acid-D <sub>3</sub>                       | 79.0                  | 79.1                  | 80.9                  | 81.0                  | 81.0                  | 74.8                  | 79.3                        |
| Tryptophan-D <sub>5</sub>                            | 87.6                  | 91.0                  | 86.7                  | 99.7                  | 105.2                 | 93.9                  | 94.0                        |
| Xanthurenic acid-D <sub>4</sub>                      | 91.6                  | 90.0                  | 92.2                  | 91.9                  | 97.8                  | 94.3                  | 93.0                        |

**Supporting Table S10.** Results of studies into matrix effects during analysis. Analytes were assessed for matrix effects by spiking SIL internal standard into both matrix and diluent blanks following extraction. In both plasma and serum matrix effects were minimal for most metabolites, with results suggesting a matrix area response of 77 %-113 % of metabolites spiked into blanks. The exception in both biofluids was citrulline-D<sub>4</sub> (plasma = 23 %, serum = 18 %). Whilst nicotinamide riboside experienced greater matrix effects in serum. To compensate for matrix effects a SIL internal standard was included in the assay.

|                                                       | <b>Plasma</b> | <b>Serum</b> |
|-------------------------------------------------------|---------------|--------------|
| <b>3-HAA-D<sub>3</sub></b>                            | 102.0         | 103.7        |
| <b>3-HK-<sup>13</sup>C<sub>2</sub>-<sup>15</sup>N</b> | 88.8          | 95.3         |
| <b>5-HIAA-D<sub>5</sub></b>                           | 89.0          | 94.7         |
| <b>Citrulline-D<sub>4</sub></b>                       | 23.5          | 18.4         |
| <b>Dopamine-D<sub>4</sub></b>                         | 88.7          | 87.3         |
| <b>I-3-AA-D<sub>4</sub></b>                           | 88.9          | 91.1         |
| <b>Kynurenic acid-D<sub>5</sub></b>                   | 103.9         | 103.6        |
| <b>Kynurenine-D<sub>4</sub></b>                       | 79.5          | 82.2         |
| <b>Neopterin-13C5</b>                                 | 95.6          | 95.3         |
| <b>Nicotinic acid-D<sub>4</sub></b>                   | 84.8          | 85.8         |
| <b>Nicotinamide riboside-D<sub>3</sub></b>            | 92.8          | 40.0         |
| <b>Picolinic acid-D<sub>3</sub></b>                   | 99.6          | 98.0         |
| <b>Quinolinic acid-D<sub>3</sub></b>                  | 105.2         | 94.6         |
| <b>Tryptophan-D<sub>5</sub></b>                       | 77.1          | 78.3         |
| <b>Xanthurenic acid-D<sub>4</sub></b>                 | 112.7         | 111.7        |



**Supporting Table S11.** Mean concentrations, standard deviation and % coefficient of variation values derived from the quantification of analytes from repeat injections of a pool of serum. The study was performed to assess multi-plate analytical performance and a pool of serum was analyzed at frequent intervals during an analytical run that consisted of eighteen plates analyzed across nine days. A total of 92 injections of the serum pool were analyzed across the eighteen plates. Note – the study pool was collected from different donors to the one used in **Table S12** and therefore reports different analyte concentrations.

|                                         | <b>QC pool mean concentration</b>         | <b>Standard deviation</b> | <b>%CV</b> |
|-----------------------------------------|-------------------------------------------|---------------------------|------------|
| <b>3-HAA</b>                            | <LLOQ                                     | <LLOQ                     | <LLOQ      |
| <b>3-OH-kynurenine</b>                  | 1.9                                       | 0.2                       | 10.2       |
| <b>5-OH-IAA</b>                         | 12.3                                      | 0.6                       | 4.9        |
| <b>Beta-nicotinamide mononucleotide</b> | <LLOQ                                     | <LLOQ                     | <LLOQ      |
| <b>Citrulline</b>                       | 6068.2                                    | 247.1                     | 4.1        |
| <b>Dopamine</b>                         | <LLOQ                                     | <LLOQ                     | <LLOQ      |
| <b>Indole-3-acetic-acid</b>             | 357.4                                     | 9.9                       | 2.8        |
| <b>Kynurenic acid</b>                   | 12.1                                      | 0.4                       | 3.6        |
| <b>Kynurenine</b>                       | 266.1                                     | 39.6                      | 14.9       |
| <b>NAD+</b>                             | <i>NA (monitored MRM transition only)</i> |                           |            |
| <b>Neopterin</b>                        | 0.8                                       | 0.05                      | 5.9        |
| <b>Nicotinic acid</b>                   | 3.7                                       | 0.5                       | 14.5       |
| <b>Nicotinamide riboside</b>            | 80.5                                      | 16.0                      | 20.0       |
| <b>Picolinic Acid</b>                   | 6.7                                       | 0.5                       | 8.1        |
| <b>Quinolinic acid</b>                  | 67.3                                      | 3.0                       | 4.5        |
| <b>Serotonin</b>                        | 23.4                                      | 2.5                       | 10.7       |
| <b>Tryptophan</b>                       | 14828.7                                   | 771.9                     | 5.2        |
| <b>Xanthurenic acid</b>                 | 3.4                                       | 0.1                       | 4.2        |

**Supporting Table S12.** Mean concentration values for repeat biological replicates (n=8). Plasma samples were pooled and analyzed at periodic timepoints across the analytical run. % CV values were <10% for each metabolite. Note – the pool of plasma was collected from different donors to the one used in **Table S11** and therefore reports different analyte concentrations.

|                                  | <b>Mean concentration<br/>(ng/mL)</b>     | <b>Standard deviation</b> | <b>% CV</b>          |
|----------------------------------|-------------------------------------------|---------------------------|----------------------|
| <b>3-HAA</b>                     | 17.8                                      | 1.5                       | 8.5                  |
| <b>3-HK</b>                      | 26.8                                      | 0.9                       | 3.4                  |
| <b>5-HIAA</b>                    | 13.0                                      | 0.4                       | 3.1                  |
| <b>βNM</b>                       | 27.6                                      | 2.2                       | 7.9                  |
| <b>Citrulline</b>                | 5428.5                                    | 158.3                     | 2.9                  |
| <b>Dopamine</b>                  | <i>NA (&lt;LLOQ)</i>                      | <i>NA (&lt;LLOQ)</i>      | <i>NA (&lt;LLOQ)</i> |
| <b>I-3-AA</b>                    | 291.5                                     | 8.7                       | 3.0                  |
| <b>Kynurenic acid</b>            | 7.9                                       | 0.3                       | 3.9                  |
| <b>Kynurenine</b>                | 121.1                                     | 5.9                       | 4.9                  |
| <b>NAD+</b>                      | <i>NA (monitored MRM transition only)</i> |                           |                      |
| <b>Neopterin</b>                 | 2.6                                       | 0.2                       | 8.1                  |
| <b>Nicotinic acid</b>            | <i>NA (&lt;LLOQ)</i>                      | <i>NA (&lt;LLOQ)</i>      | <i>NA (&lt;LLOQ)</i> |
| <b>Nicotinamide<br/>riboside</b> | 801.2 (>ULOQ)                             | 71.9 (>ULOQ)              | 9.0 (>ULOQ)          |
| <b>Picolinic Acid</b>            | 5.4                                       | 0.3                       | 6.5                  |
| <b>Quinolinic acid</b>           | 69.0                                      | 4.1                       | 6.0                  |
| <b>Serotonin</b>                 | 43.0                                      | 2.5                       | 5.8                  |
| <b>Tryptophan</b>                | 12681.0                                   | 1067.4                    | 8.4                  |
| <b>Xanthurenic acid</b>          | 3.5                                       | 0.1                       | 3.4                  |
